# Supplementary material
Source: Springer Nature journal article supplement (http://www.springermedizin.de/resource/supplementary/12876_2012_869_MOESM1_ESM.pdf/9437952)

# HCC HEPATOCYTES

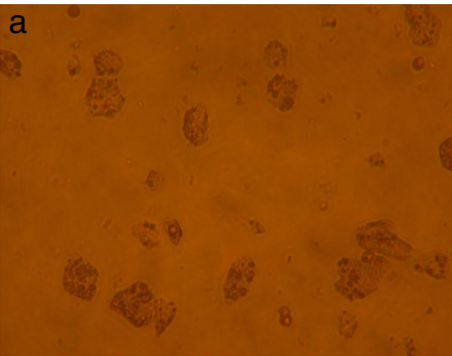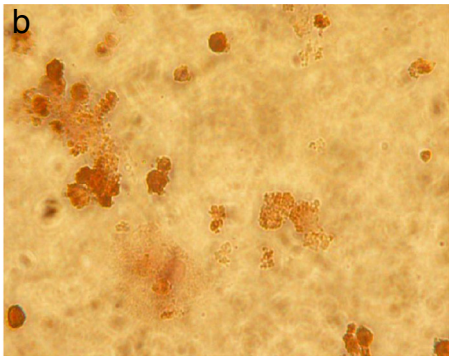

Supplement: MOESM1 [file 9437952]
